# Supplementary material
Source: Springer Nature journal article supplement (https://www.springermedizin.de/resource/supplementary/12894_2012_223_MOESM2_ESM.pdf/9513238)

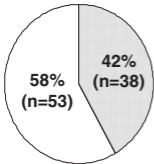

**Incidence in all patients**  
**(n=91)**

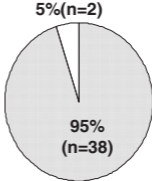

**Incidence in sexually active patients**  
**(n=40)**

Supplement: MOESM2 [file 9513238]
